# Supplementary material for: Development, implementation and real-life use assessment of HIBOOT: a smartphone application for safety, self-assessment and medication adherence for patients with inflammatory arthritis. A user-centred step-by-step approach.
Source: Research Square preprint supplement (doi:10.21203/rs.3.rs-266018/v1), 2021-03-05
Supplement: Supplementary file 1 [file 7d70e0c807cd3f11ca6db057.docx]

**Supplementary material 4: Qualitative study 2. Patients’ semi-structured schedule.**

1) History of patients’ care pathway

How long have you had RA? How did it start?

Could you describe your disease course and possibly identify key landmarks?

What DMARDs did you take? What DMARDs are you currently taking? Did the dosages or form change along time? Who decided the treatment changes? Yourself? Your doctor?

In which circumstances were the prescriptions done? What were prescriptions reasons? How did you feel about it? Why were the treatments changed?

Do you have associated co-morbidities? Are you under treatments for other diseases?

2) Patient-rheumatologist relationship

Have you been followed by the same rheumatologist since the disease started?

How often do you see him/her? What is your relationship with him/her?

Can you discuss medical issues about with him/her? Can you freely talk with him/her about information you have found by yourself about your disease, about treatments, about different types of care, for instance on the internet or by other information sources ...?

Are there things you don’t tell your rheumatologist about, i.e. your own experiments with your treatments? Things you don't tell him/her lest he/she be would worried/displeased about?

Does your rheumatologist inquire if you regularly take your treatment?

Have you mentioned side effects or aspects of the treatment you were worrying about? What has been your doctor’s reaction? Does he/she regularly remind you of the treatment’s risks associated?

What are your expectations from your rheumatologist?

Do you believe your rheumatologist has expectations from you? Have these expectations changed with the new treatment?

3) The treatment decision process

Is it always the same physician who prescribes your treatments?

For each treatment, how did the decision-making process go with him/her? How did you react to the doctor's proposal for a new treatment? Had you heard about this treatment before?

Did you ask your doctor to prescribe it? For what reason?

How did you come to take JAK inhibitors? How did your doctor introduce this treatment to you?

Did he/she give you any special warnings or points of attention?

Do you feel that your doctor has given you the keys to weigh the pros and cons in choosing your treatment? Did you doctor guide you in your choice?

Do you feel the doctor knows your particular case and considered your own specific circumstances when he proposed this treatment?

How do you feel about this treatment compared to the previous ones?

Did you have any preconceived ideas about JAK inhibitors?

What was the most decisive in your choice: the discussion with the doctor? Did you consult relatives? the internet, other health professionals, patient associations…? What kind of information did you find?

How often do you take your medication?

Can you describe the exact circumstances of your treatment intake?

Who at home reminds you about your treatment?

How do you remember to take it? Do you have constraints with your treatment?

Do you take any special precautions around your treatment?

Have you always respected your prescription?

Do you feel you have a freer relationship with your treatment? (compared to injections)?

Did you have any fears when you started the drug? What were your feelings?

Do you feel that the treatment was matching with your own needs?

How is your treatment included in your disease management?

What place does this treatment occupy in your daily life, in your projects?

What has changed compared to other, perhaps more restrictive treatments?

Have you encountered any difficulties related to the treatment: What solutions have you found to overcome them?

What impact has this treatment had on the way you view your disease?

What makes an oral or injectable treatment different for you: do you feel it works differently?

Does an oral treatment (taking a pill) change the way you feel about the disease compared to an injection?

Do you feel you are at less risk with this treatment than with others?
