# Supplementary material for: Development, implementation and real-life use assessment of HIBOOT: a smartphone application for safety, self-assessment and medication adherence for patients with inflammatory arthritis. A user-centred step-by-step approach.
Source: Research Square preprint supplement (doi:10.21203/rs.3.rs-266018/v1), 2021-03-05
Supplement: Supplementary file 2 [file aa9f20e45a1d8f117a51f3b1.docx]

**Supplementary material 6. HIBOOT functionalities and content**

| Functionalities and content | First version | Current version | Comments |
| --- | --- | --- | --- |
| Available treatments | Methotrexate, TNF blockers, tocilizumab, abatacept, rituximab | Methotrexate, TNF blockers, tocilizumab, abatacept, rituximab, tofacitinib, baricitinib, ustekinimab, secukinumab | Including new DMARDs depended on the availability of the French Society of Rheumatology recommendations |
| Home page | • | •• |  |
| Treatment reminder | • | •• | Optional in current version |
| Treatment changes (type and ranges) | • | •• |  |
| Checklist before administrating treatment | • | •• | Optional in current version |
| Information on daily risk situations | • | •• | New risk situations due to new treatments inclusion and patients’ requests in current version |
| General information et messages | • | •• | New information in current version including COVID-19* |
| Self-assessment | • | •• | Interface more friendly in current version |
| Other treatment monitoring |  | •• | Patients can add all their treatments |
| Medical appointments |  | •• |  |
| Blood test appointments |  | •• |  |
| Other kinds of appointments |  | •• |  |
| Treatment orders |  | •• |  |
| Personal comments, events, memos |  | •• | Patients may add all their personal comments concerning their life and disease |

• availability in the first version. •• modified or added in the current version. *Information on COVID-19 could not be pursued on Android after June 2020 because of cancellation by Google. ** user: individual using the app once a month or more

TNF, tumor necrosis factor
